# Supplementary material
Source: PubMed Central journal article supplement (PMC8403516)
Supplement: NIHMS1716273-supplement-1716273_SI_Guide.pdf [file NIHMS1716273-supplement-1716273_SI_Guide.pdf]

1 **Supplementary Methods** – this section provides the sequences of the RNAi  
2 constructs, the targets of which affect cell extrusion.

### 3 4 **Supplementary Video Legends**

#### 5 **Supplementary Video 1 A control embryo extrudes ABplpappap**

6 Time-lapse video of a *ced-3(lf); stls10026[his-72::GFP]; nls632[P<sub>egl-1</sub>::mCherry::PH]*  
7 embryo after RNAi against empty vector control over a 50-minute period ending in  
8 ventral enclosure shows ABplpappap (circled at the beginning and end of video) was  
9 extruded from this embryo. All nuclei are labeled with GFP (green) and membranes of  
10 *egl-1*–expressing cells are labeled with mCherry (magenta). Time-lapse images used to  
11 generate this video were obtained using confocal microscopy. Video playback is at 600x  
12 real speed.

#### 13 14 **Supplementary Video 2 A *cye-1*(RNAi) embryo does not extrude ABplpappap**

15 Time-lapse video of a *ced-3(lf); stls10026[his-72::GFP]; nls632[P<sub>egl-1</sub>::mCherry::PH];*  
16 *cye-1*(RNAi) embryo over a 50-minute period ending in ventral enclosure shows  
17 ABplpappap (circled at the beginning and end of video) was not extruded from this  
18 embryo. All nuclei are labeled with GFP (green) and membranes of *egl-1*–expressing  
19 cells are labeled with mCherry (magenta). Time-lapse images used to generate this  
20 video were obtained using confocal microscopy. Video playback is at 600x real speed.

#### 21 22 **Supplementary Video 3 A *cdk-2*(RNAi) embryos does not extrude ABplpappap**

23 Time-lapse video of a *ced-3(lf); stls10026[his-72::GFP]; nls632[P<sub>egl-1</sub>::mCherry::PH];*  
24 *cdk-2*(RNAi) embryo over a 50-minute period ending in ventral enclosure shows  
25 ABplpappap (circled at the beginning and end of video) was not extruded from this  
26 embryo. All nuclei are labeled with GFP and membranes of *egl-1*–expressing cells are  
27 labeled with mCherry (magenta). Time-lapse images used to generate this video were  
28 obtained using confocal microscopy. Video playback is at 600x real speed.

#### 29 30 **Supplementary Video 4 ABplpappap arrests in S phase and is extruded in a** 31 **control embryo**

32 Time-lapse video of a *ced-3(lf); isls17[P<sub>pie-1</sub>::GFP::pcn-1]; nls861[P<sub>egl-1</sub>::mCherry::PH]*  
33 embryo after RNAi against empty vector control over a 35-minute period ending in  
34 ventral enclosure shows ABplpappap (circled at the beginning) arrests in S phase and is  
35 extruded (circled at the end of video). All cells express GFP::PCN-1 (green) and  
36 membranes of *egl-1*–expressing cells are labeled with mCherry (magenta). Time-lapse  
37 images used to generate this video were obtained using confocal microscopy. Video  
38 playback is at 600x real speed.

#### 39 40 **Supplementary Video 5 ABplpappap completes the cell cycle and is not extruded** 41 **in a *pig-1*(RNAi) embryo**

42 Time-lapse video of a *ced-3(lf); isls17[P<sub>pie-1</sub>::GFP::pcn-1]; nls861[P<sub>egl-1</sub>::mCherry::PH];*  
43 *pig-1*(RNAi) embryo over an 80-minute period ending in ventral enclosure shows  
44 ABplpappap (circled at the beginning) completed the cell cycle and divided to generate  
45 daughters (circled at the end of video) that were not extruded. All cells express  
46 GFP::PCN-1 (green) and membranes of *egl-1*–expressing cells are labeled with

47 mCherry (magenta). Time-lapse images used to generate this video were obtained  
48 using confocal microscopy. Video playback is at 600x real speed.

49

50 **Supplementary Video 6 A vehicle-treated MDCK monolayer extrudes a few cells**

51 A time-lapse video of mammalian MDCK monolayer treated with vehicle control for  
52 21.25 h obtained using phase contrast imaging shows that a few cells are extruded  
53 during this period. Extruded cells can be identified as bright, white, rounded spots rising  
54 from the epithelial plane. Video playback is at 7200x real speed. Scale bar, 100  $\mu\text{m}$ .

55

56 **Supplementary Video 7 A HU-treated MDCK monolayer extrudes a large number  
57 of cells**

58 A time-lapse video of mammalian MDCK monolayer exposed to HU for 21.25 h  
59 obtained using phase contrast imaging shows that many more cells are extruded during  
60 this period as a result of HU treatment. Extruded cells can be identified as bright, white,  
61 rounded spots rising from the epithelial plane. Video playback is at 7200x real speed.  
62 Scale bar, 100  $\mu\text{m}$ .

63
