# Supplementary material
Source: PubMed Central journal article supplement (PMC8403516)
Supplement: NIHMS1716273-supplement-1716273_Sup_Methods.pdf [file NIHMS1716273-supplement-1716273_Sup_Methods.pdf]

# 1 **Supplementary Methods**

2

## 3 **RNAi Construct Sequences**

4 The following sequences were used in the RNAi vector pL4440 or its derivatives. The  
5 gene targets of these RNAi constructs affect cell extrusion.

### 6 ***pig-1(RNAi)*:**

7 CTTCTGTGCAATAGAGCGTAATAAGTCGACGTCATGTAATCAAATTCCATTCTTT  
8 GATCTTTTCAATCATTGTCTGTCGACTCAAATCCATAGTACTTTGACATCACCCG  
9 AGCCACGTCACGATCGATAAAGTTTTCTGTAATAAAAAATTGAAATATAATTCAAAA  
10 AATACAAAAGTGAGCTACATCATAAATCGTGTTCCATTTCACCGGCTGTGTGATT  
11 TGTGATTGAGCCAATCGTGCTCGAGCAGCTTCTTGACACTGATCCTCCGTTCTGGA  
12 ACCACTTGGAGCATTGCTCGGAGGAGTTGCTTGCTGAGCGGCGATAGGAATTCGG  
13 GCTCGTAGAAGCATCCGGACTGGAAATTAACAATTGAATTGATTTACAGTCAATTT  
14 TTTGCAGTTTTTGACCATTTTCGCATAGTTTCGCATAGTTTTTGCTGAATTTTTCGTTA  
15 AATTCGTTTGTGAACGCATGTTTTCACTAAAAATTTGAATATATTGTAGAGTTCTACC  
16 AGATTTTCGAGCTGTTCAAAAAAACATTTATTTTTATTCCATTTTTCACTTTCC  
17 ACTTATTTTTTGGTATTACTTGGTTCGGTCACGGCCGGGTTCGATTTACGGTGCGC  
18 GCGGTGTCGCGTCGCGGCTCGGTTTTCAATAGGGGACAAAAATTTGCTCTTTTG  
19 ATCTTTTTTTCAACTTTCTAAGGTTTTTAAACAAAAGAGCATATATTTTCCTGTTAG  
20 GTATTAGCAAACATGACTAAAAATTGAAATAAAAAATTATTTAAGCCCTGCTTCAGC  
21 ACCTCTAAAATAGAGCTCAAACAAAACCGAAATTTCTACAAAACGTCGAATATATA  
22 GTGAAAAACTGCGTTTGAACGAATTTAAGTGAAAAATGATCGAAAAATTGAAAA  
23 ATCGATATTTTAGCTAAAAATTTGTCTCAATATACAGGAAATCACTTGATTTATCTG  
24 AAAATGTCATTTATTTTAGCTGAAACAATTGAGAAAGTGCTCTAAAATTGGTAGAAA  
25 GTTTGCCAAATAAATTTCTGGTCATTTTGAGCGCTTTCTCGAATTTTACGCTCAAATA  
26 AATGATATTTCTAGAAAAATTTGGTGATTTCCAACATTTTAAAATCAATTTGCAGCTG  
27 AAAAATCGAGAACTGCTCAAAAATAGCCGGATCTTCGAATAATCGAGCAGTTTTTC  
28 GACAATTGGCATCTTTCTGACCATTTTGGAGCATTTTTAGCTGAAATCAAAGAACTT  
29 TTCAGACAAATCAAGTGATTTTCTATATATTTTCACTAATTTTCAATGAAAAATAAAAT  
30 ATCTGTACTTGAATCTTTTTGTACATAATTTGCATATTATCATCTTCAAATGGCAATG  
31 CTCCGACGAGAAGTGTATATAATAAAATGCCATCGACCAGACATCCGCCTCGTTT  
32 CCCTTGACTGCAAGCCCTGTATCAACTCGGGCGCCGCATAGGCCGGAGATCCAC  
33 AACACGTATCCAAATTGTGCTTATCAATACGGCCTTTTTTCAGTCTTCGCGCATAACC  
34 CGAAATCGATCAATTTCAAGGTGAAGATCCTCGGTGAGCAGGAGATTTTCCGGTTTC  
35 AGGTCTCGATGGGCATATCCTTGTGAATGAACGAAAGCGATCGCACTGACGAGCT  
36 GCCGGAAGAAATGACGAGCTTCAGACTCTTCGAGCCGCTCCTTCCGCACAATATA  
37 ATCGAACATTTCTCCTCCACTGCAGTACTGAAACAAATTTAACAGTTAAATAGTTGT  
38 TTTTTTCTAAAATTAGGTTTTTACCTCCATAACGATGAAAAACTTGTCTTCTGTCTCT  
39 ATGTAATGGTACAGACGACATATTTCTGATGGGACAAATTGCGCAAGGCGTCCAT  
40 TTCCGTTTGAACCTCGCGGCAGGTCATGCTGAAAAAATACAGTTTTTATCAAACAATT  
41 TTATCAACAACTCACTCCAAGCTGCTTCTTATCTATTATCTTGATGGCCACCTTTTG  
42 ATTTGTCAGCAAATGTGTTGCTAGGCGGACTTTTTCCGAATCCTGTAAT

43 ***grp-1(RNAi):***

44 CGGGCCCCCCTCGAGGTTCGACGGTATCGATAAGCTTGATATCACAAAGTTTGTAC  
45 AAAAAAGCAGGCTTGACTCTTCCCAAAGTACGCAAGAGGAAGGCACAACCTTGTCG  
46 ATGAAATTGAGGCGCTAAAAATGAGGTACGAGAAGTTGACGAAGAACTCGATCAA  
47 GTATATTACACCCATCCAAAATCAAAGAATATCACAAAATAGTGGTGAATGGCCGA  
48 AAAAAAGTTCAATCAAGACCCATGGAAAGCGTTGGATTGGTTGGCATCAAGAAATGT  
49 AGTTGCAAAGGATCCTCAAGCATTGGCGCTCTGGATGAAAGCTGGCGAAGGACTT  
50 TCTAAAAGTGCATCGGCGAAATACTGGGTGATAACCGTCCATTTGCGTTGGAAAC  
51 CCTTGACAGATTCACAAAAGAACATAAATTGCATGATGTTCCGATTGTTCCAGCTCT  
52 TCGTCAATATCTATTTTCTTCCGGCTACCTGGCGAATCGCAGAAAATTAATCGAAT  
53 TTTGGAGAAATTTGCAGAAGTTTACGCGAATCAAATCCATCATATGGAAATGCAGA  
54 TCAAGCACATACAGTAGCATATTCATGTATTATGGTTAATACATTATTACATAATCCA  
55 AACGTTAAAGATAAACCATCACTGGAAAAATATATTGAAATGAATGAGCAACTTCTC  
56 GAAAAAGGTGCAATTACAATCGAACAGCTCACAGAAGTATATGAATCAGTTAGTGT  
57 TACACAATTCAAGATCCCAGATGAAGTATCGACAAGTGGAAAAGGAACTGTGAACG  
58 ATATTCTATTACATGCTGAACG

59 ***cdc-25.2(RNAi):***

60 GCGCGTATACGACTCACTATAGGGCGAATTGGGTACCGGGCCCCCCTCGAGGT  
61 CGACGGTATCGATAAGCTTGATATCACAAAGTTTGTACAAAAAAGCAGGCTTGAATA  
62 GGCCTTCACAAATATCCCAAGATGTAGCACAAACCGCTTTCTAATCAGCATGAAACC  
63 GCGATGATGTCCTCCGACGAAGATTCCATGTACGCGACTCGGGGATCTGCGAGT  
64 TGATGGACGAGAACACGCCGGTTTGCTTCTCCTCAATGTCTACAGAGTCGACGAC  
65 CGTCCAAGTCGAAGAGTGCATGGAAATCGATGAGGATGAAAATTTACAGCCAGGA  
66 CCTGTGTCTCGCCGCCAGAAAAAAGTCACGTTTACAGACGAGAGAAGAGCTCCTGCC  
67 AGGTGCGTCTGTTGACGAGTCGCCACCTCGCACAAAGATGTTTATGCGCCCGCA  
68 AGCCCCGCTGTGCGTTTCGATCCGAAAACCAACAACCTCCTACAGCAGCGGAAACGG  
69 AAGTTGAGAAAGAGCGAACAATCGTCAGATCATTTCATTTAGAGCCGATGAGCGT  
70 CGAGGCGATGGACGACGACGAAATCGTGATGATGGACCAGAACACCACCAAGTG  
71 GGAGCCAGGCTTTC

72 ***lin-23(RNAi):***

73 CCTCGAGGTTCGACGGTATCGATAAGCTTGATTAGTCGAGACATGTCAGTGCGACG  
74 AATCTGTGAAAAATTCAACTACGATGTGAATATTAACGGGATAAGCTTGATCAGCT  
75 CATTTTAATGCATGTCTTCTACAGTAAATTATATCCAAAATCATTTCGAGATATTCAT  
76 AACATTGACAACAACCTGGAAACGTGGAAACTACAAAATGACTCGAATAAATTGTCAA  
77 TCAGAAAATAGCAAAGGAGTATATTGCCTTCAATATGACGATGACAAAATTGTATCT  
78 GGTTTGAGGGACAACACTATTAAGTCAGAATGATATTATTTTATTTCAAAATAAC  
79 TCTGATATTTTTAGATTTGGGATAGAAAAGACTACAGCTGCAGTCAATTCTTCTG  
80 GACATACTGGTTCCGTTTTATGCCTTCAATATGACAATCGTGTAATAATTTCTGGAT  
81 CTTCTGATGCCACAGTACGTGTCTGGGATGTGCGAACTGGAGAGTGCATTAACG  
82 TTAATTCATCATTGCGAAGCTGTTCTTCATCTTCGATTTGCTAATGGAATAATGGTAA  
83 CATGCTCAAAGATAGATCGATTGCTGTCTGGGATATGGTTTCGCCACGCGATATC

84 ACAATTCGAAGAGTTCTTGTTGGTCATAGAGCAGCTGTAAATGTCGTTGATTTT  
85 GATAGATATATAGTCAGTGCAAGTGGAGACCGAACTATTAAGGTGAGAATTTGAAA  
86 TTA AAAA ACTGCTTTTCCAGTTATTAAGAAG

87 ***cya-1(RNAi):***

88 CGTATACGACTCACTATAGGGCGAATTGGGTACCGGGCCCCCCTCGAGGTGCGAC  
89 GGTATCGATAAGCTTGATATCACAAGTTTGTACAAAAAGCAGGCTTGCGAACAAT  
90 TCTCATCGATTGGTTCAGCGATGTCGTGAAAGAGTACAATTTCCAAAAGGAAACAT  
91 TTCATCTCGCTGTGAGCCTCGTTGATCGGGCTCTTTCAATGTTCAACATTGATAAAA  
92 TGCGATTTCAATTGGTTGGAACGACGTGATGATCGCAGTGAAATACGAGGAA  
93 ATCTTTCCGCCAGAGATTGAAGACTTTGCTCTCATCACTGACAACACCTACCGAGT  
94 TCCCGACATTCTTTAATGGAGCGATTCTTGCTCGGAAAGTTTGACTTCGTTGTTGC  
95 AATGCCACATCATCTTGGTTCGGAACATGTTTTGCCAAGAGAATGAACTTTACAAA  
96 AAAGATGCGGAATACTGTTCAATTATCTCCTCGAGTTGTCGCTGATAGATGTCCATTT  
97 TCTACGTTACCGCCATCTACCCAGCTTTCTTGTAACAAGTGGTGATATCAGATCTG  
98 CCGGTCTCCCTATAGTGAGTCGTATTAATTTGATAAGCCAGGTTGCTTCCTCGCT  
99 CACTGACTCGCTGCGCTCGGTGCTCGGCTGCGGCGAGCGGTATCAGCTCACTCA  
100 AAGGCGG

101 ***cdk-1(RNAi):***

102 CCCCCCTCGAGGTGCGACGGTATCGATAAGCTTGATATCACAAGTTTGTACAAAAA  
103 GCAGGCTTGGATCCTATTCGCGAAGGAGAAGTGGCCCACGAGGGAGATTCGGTTT  
104 ACACACTCAACGATTTACGAAGCTCGAAAAAATCGGCGAAGGAACATACGGAGT  
105 CGTCTACAAAGGCAAAAACAGAAGAACCAATGCCATGGTTGCTATGAAGAAAATCA  
106 GATTGGAAAGTGAAGATGAGGGTGTTCATCAACGGCTGTGCGAGAGATCAGCTT  
107 GCTCAAAGAGCTCCAGCATCCGAATGTTGTTGGATTGGAAGCGGTCATTATGCAG  
108 GAGAACCGGCTTTTCTGATCTTCGAATTCCTGTCTTTGACTTGAAACGATACATG  
109 GATCAGTTGGGAAAAGATGAATACCTTCCGCTCGAACTCTTAAAAGTTACACATTC  
110 CAAATCTTCAAGCTATGTGTTTTTGTATCAGCGTCGTGTTATTCATCGCGATCTT  
111 AAGCCACAGA ACTTGCTGGTCGACAACAATGGAGCAATCAAGCTTGCCGATTTGCG  
112 GACTTGCCAGAGCTATTGGTATCCCGATTGCGGTTTACACGCATGAAGTTGTCACT  
113 CTCTGGTATAGAGCTCCAGAAATTCTGATGGGTGCTCAGAGATACTCGATGGGCG  
114 TAGACATGTGGTTCGATTGGATGCATTTTTGCTGAAATGGCCATGAAGAAGCCACTG  
115 TTTCAAGGAGATTCAGAAATTGATGAGCTGTTCCGCATCTTCAGAG

116 ***cye-1(RNAi):***

117 GGTACCGGGCCCCCCTCGAGGTGCGACGGTATCGATAAGCTTGATATCACAAGTT  
118 TGTACAAAAAGCAGGCTTGGCTGGAAGAAAGTCATCAAGGACGGCTGAACGTGT  
119 CCCACTACACAAAAGCCAGAAAGAAAATCTGCTATTTTATCTCCACATGACGAACT  
120 GCGTGAACGTCTTCTGGAGACTGCAATTGATATGAAGGAAAATATTCCACAACGAA  
121 ATACCCGAAATTCGAGCGTTGGAAGTCAGAAATCAGATTGTTCTGAGACAAGAAAA  
122 CGACGAAGTACTAAGGGAGGTCCAGCTGCAAAACGTCATTCGGGCGAGAAGCATC  
123 GAAATGGTAGCCGCGAAGATTCTTTGGAGTATATTAGTGAATATTCAGATGATCGT

124 GAAGTTGGATCTTCATCATCACAATCATCAAGAACCCGTGGACAACCACTTCCAGC  
125 TATGCCTGAGGAAGAAGAAGTGTGGATAAATCATCTTCATCTGATAATCTTGCCGA  
126 ATCTGAAGAAAGTCATGAGATGGTCCGATTGGAAGAGAGACAGGATATTGAAGAA  
127 GAAATTGAGGATGATTTTGATGATGAAGAGGAGGATGTTGTTAACGATAAAGAGGA  
128 GTACGAAGAAATTGAATCTGAAGATGAAGATGATTATCCTGTCCAAAACGAAGGAT  
129 TTGCCGTTACAAAACGGCTCATGAACGACGAACATATGGTTACGGCTCCAACGTTT  
130 CTCAGCACAGCAAAATGCGATGGAATAGGATCACCAACAAAAGTTTGGTCTCTTAT  
131 GGTCAAACGAGACGAAATTCCACGTGCTACACGATTCTTGCTTGGAAATCATCCGG  
132 ATATGGATGATGAAAAGCGACGTATTTTAATTGATTGGATGATGGAAGTGTGTGAAT  
133 CAG

134 ***cdk-2(RNAi):***

135 ACCCCCTCGAGGTCGACGGTATCGATAAGCTTGATTGACACCCTTGAAGAGGAAA  
136 GACTCGGTAAAAAGAGAGGACATAGTACACGATGTTTAGGTTATGGAGGACATGAT  
137 ATATTAGAAGATTGACTTCTCCTGATGATTGTTGAGCAGCGGTGGCGTCTGAAATA  
138 ATTTTTATTCATTAATAAATAATCCAAATATTCCAGTAACTTTACCCTGTTCTGCGCT  
139 CGGATATCCTTCATCAAATCAGTGACACTCGGCCGGTTTTGGGTGAAACCGTTCTG  
140 TAGAAAGTAGCGATGAGAGAGAGCACCTTTCGCGGTGAGACGTGCTCCGGTGGA  
141 TAACGAAGTATCTCACGAAGCACGTCAAGACCATTTCCAGTCAGGCATGATGTTTC  
142 TTCGAGCTTCTTCAAATTCACCGGCCACTGTGGAAGACAGCCTTGTAGTGGGGAA  
143 ACGAGTCGACGCCTGGCCAGCTCTGCAAAAATTATTCGAATTTAAAAGTTTTTTGAA  
144 TAATTTAAAGTCACGGGGTTCTGGCCTTCCTCATTAAATTTTTCGCGCTCCATCGAC  
145 AATCACCGTGGGAAAGTCGTGTACTTCACACGGACAAATACATTTAGTTTTACAAC  
146 AAAATCGAGCTGCGACGCGACGCAACGCACCGTAAATCTACCCGAGATATGGC  
147 CGAGCCAAAATGGTCTAGTTCGGCAAACCTTCCATTTCAATTTATGAGGAAAGCC  
148 AGAAATCCGTGTAG

149 ***psf-1(RNAi):***

150 CTATAGGGCGAATTGGGTACCGGGCCCCCCTCGAGGTCGACGGTATCGATAAG  
151 CTTGATATCACAAGTTTGTACAAAAAAGCAGGCTTGAGTTCCGGCGATCAGAATCG  
152 AGGAGGCGTCGCCGACAAAGCACTACAACCTTGTTTTAGAGATGAAAAGAAATCCAG  
153 ATGTATTACCGCCTTATAACACAGAACTTGACGCCAATGTTATCAGAAAATCGATG  
154 AGTTGTTTTCAAAGAATGCTGCCGTGTTGAAAAAATCCGTGCAGGACTCCCTCAT  
155 GATTCTACGCTTCTTCAACCTCGTTTAGCTGCAATGTGCCATATTCGACGTTGCATG  
156 ATGGCCTATGTGAACGAGAGGAAAAACAGGATTCGATCATTGAGATGGAAGTATGG  
157 AGGTGCTCTCCCGCGTCTGTTAGGAACGCCCTCTGCGATGCGGAAATTCAGTTTT  
158 TCAATGAGTATTCGAGCACATTGGCAAGATTCCAAAGCAATCTTGAGAAAGGTGGT  
159 GTTAATCTGCTGCTTCATTCTGCACCACCGAAGTCACTTTTTGTACAAGTTAGAGCT  
160 CTCGAGGATTATGGAGAATTTGAAACGTCAGATGGAACCAAGTTCAGCTGTCCAA  
161 GGATAGTTTGCACCTCCCTTCCACGCCAAGACTGCGAAATGCTGATACGTCAGGGT  
162 GTTCTCGAGCTTGTTTATTACCCAGCTTTCTTGTACAAAGTGGTGATATCAGATCTG  
163 CCGGTCTCCCTATAGTGAGTCGTATTAATTTGATAAGCCAGGTTGCTTCCCTCGCT  
164 CACTGACTCGCTGCGCTCGGTGTTGCGGCTGCGGCGAGCGGTATCAGCTCACTCA  
165 A

166 ***psf-2(RNAi)***:

167 CTATAGGGCGAATTGGGTACCGGGCCCCCCTCGAGGTTCGACGGTATCGATAAG  
168 CTTGATATCACAAAGTTTGTACAAAAAAGCAGGCTTGAATGCAGAACGTTGCGAGTT  
169 CATCGCCGGAAACTCGCTTATTGAAGTGATCCCCTCAATTTCCGATGACCGGCCGA  
170 TTCACCTGATTTCCGGCGATATTGGTCCATTTGAGGCAGGCGTACCCTGTCGGATT  
171 CCAGTTTGGACAGCGATTTTGTGAAACGAAAACACAATTGCAAGGTGGTGGCTCC  
172 TCAATGGATGGATGTAGATGAGCTGAAGAAGATATTGACGTCAGAGACTGAAAGCC  
173 AAGGATTGGCGAAATTACCGGATCATTCTTTGAAATCTCGCATATGCTTGTTGAG  
174 ATGCCCGTGAGGATATATTCGAAGTTGAAGCTGTCAAATCATTGGTTCAGGACATT  
175 TATGATCGGAGGGACGCAAACTTCGAAGCTCAGCGATCGAATTTCTGAGACAGA  
176 ACCAAACCTGCCACGCTCAATTGGACAACGTTGAGCTGATTGAAGCATCGTCCGCT  
177 CGTGCCACTTTGGAGGCCTGTCGTCAGATGGGAGCTGTCGTCCGTAATAAACACG  
178 AATCAACACCTTTATACCCAGCTTTCTTGTACAAAGTGGTGATATCAGATCTGCCGG  
179 TCTCCCTATAGTGAGTCGTATTAATTTGATAAGCCAGGTTGCTTCCCTCGCTCACTG  
180 ACTCGCTGCGCTCGGTTCGGCTGCGGGCAGCGGTATCAGCT

181 ***psf-3(RNAi)***:

182 CGACTCACTATAGGGCGAATTGGGTACCGGGCCCCCCTCGAGGTTCGACGGTAT  
183 CGATAAGCTTGATATCACAAAGTTTGTACAAAAAAGCAGGCTTGGCTGGATTTGAAA  
184 TTCAAAGAGTCGAGTCCAAATTCTTCGACTTGGACGACATAATCGCCAAGTCAGAC  
185 TCCACGTCTTGACATTTGAGATTGGAGATTTGAATCCAGATTTCTTCCAGGAAATG  
186 CTGGGAGTTTCGAAGCCAACTCAAATGCAGACGGATACGGCGTTGATGCTCCAT  
187 ACTGGCTGCTGGAATCCGTTAGAAGTTCATTTCCATTCAACTGCCAAAAGCTTATA  
188 GTGTGAACATGCAAATGTGCTGAACGCTGACAGCAAGAAATTGAATCTCTCCGGC  
189 TTGCAGCAACACTTTTACGGCAACGGGATGCAGTTATGCCGTCTGATGAAGGGCG  
190 AAAATCCGGACGGCGCGCTGAGCCTCGCACGATGCCTTGTCTCCACACTTACACA  
191 GCGATTAGGAGAAATTGTGTCAACTGCAACCCATCTGCAAAGCAAAGGCGAGAAAT  
192 TTGACAGCCTCGAGACAAAAGTGTTCTTGGAGGGTAAACGGTGCAAAGAAGACAT  
193 TGATACTTGGCTGAGACAAGACAATAAGTGCTCGAGCAAGAAGCGTAAGAGACTTT  
194 CGTTATACCCAGCTTTCTTGTACAAAGTGGTGATATCAGATCTGCCGGTCTCCCTAT  
195 AGTGAGTCGTATTAATTTGATAAGCCAGGTTGCTTCCCTCGCTCACTGACTCGCTG  
196 CGCTCGGTTCGGTTCGGCTGCGGGCAGCGGTATCAGCTCACT

197 ***atl-1(RNAi)***:

198 CCTCGAGGTTCGACGGTATCGATAAGCTTGATTAGCAAGGCAATCAGTGTGTGACT  
199 TTGAATAGAGTGTTTGTTCGCGCTGTAACGATTCCGAGATTTAATTGTTTAATAT  
200 TCTAATTAACCTACCATGCAAATCTCACTTGCTGTCATACATAGCCTCGCAGGAAAC  
201 TCATGTATATCATGGTTTGTGATAAATCTAACAACAACAAGGAAAAGTTTTCTAGT  
202 AGTCCAACTTGTCAATTTGCATCATCGATTAACCTCTAAATAAATTATGAGCCATTGA  
203 ACTGGTTTTTGTGCAAGTTCTTTATGCATAATCAAACCTTTGCCATGATCCTGTAGA  
204 AAGTGTTGTATCTCCTGAAATTGATAAATTATACATTTCGAAGTATAAAAATGAAATTA  
205 CATTCAATAGCTTTGGAAACGTCATGTGATTGGTCGACTTCTTCGCAGTTAATGAGT  
206 TAAATGTGGCAAACAGTTCATCAATGAACAGGGCCTGATCAAGAATAGAATTGTGC

207 AGTTTTTTTATATTTTAAGATTGTCAATCCAGCACGCAAGCAATTTTCGGTCATCGAG  
208 CAATCATTTTTTCAGTTTGTCTTCCAAGTGTGATCGGCAGTGAGGCCAAAACAGAAC  
209 CAATTCATCGAAATGAACGCATTCTCCTGCGTTTTCTCCGAATAAAGTTGAAATGAT  
210 ATTCCACTTCAAATGATATCTAAAAAATCCTGAGGCACCTAATGAA

211 ***atm-1(RNAi):***

212 CGAGCGCAGCGAGTCAGTGAGCGAGGAAGCAACCTGGCTTATCGAAATTAATACG  
213 ACTCACTATAGGGAGACCGGCAGATCTGATATCATCGATGAATTCGAGCTCCACCG  
214 CGGTGGCGGCCGCTCTAGAAGTGTGGATCCACCGGTTCCATGGCTAGCCACGTG  
215 ACGCGTGGATCCCTGGCCATCGGTACATCGTTTTTCCGTTTATTTCAACACGTTGT  
216 ATCCGAACGTTTCCTCTCACGTCAAGCATTGCAATTTCTCTGAAAAAACTGTTCTA  
217 AACTTTTCGATTCAAACCAAGGATGCCGTGCGTTTTTATTGAAATCGAACAATTGAAC  
218 ATATTACATGTTCTAGATGCTTTTTTCCATCAAATGAATGAAAATTGGTAAAAATTA  
219 TATGCTGTAGCGTTAGATAATATAATTTTGGAAATTGTTACGTATCGCCGATGA  
220 AAGTTTAGAAGTAAAAGAGTATTTGCTTAAATTATTGAATATGCTCAAAAATAACCAG  
221 AAGAACCTAATTTTTTTCGTTGATTGGATACCACGACACTAAAATTGTCAGAAAAAA  
222 GCGAAGATTTTTGTAACTTGATAAGAAATCGAATTTCTCGTCTTTTTTCGAAATTTCA  
223 AAAAAAATTTAGCCGCCGTATGTACCTATAAGCCTGGTGAGCCTCACGAATAGTAA  
224 TCACAATCTCCTTAAGCTTCGACGAATCCCGTTGGTCAGCTCGCGCGTCAAATATC  
225 GTTTTCAAGAAGCCTTTCACCTTGGAAGCGTTCTTCTCGTCATCATAACATCAA

226 ***chk-1(RNAi):***

227 CCTCGAGGTCGACGGTATCGATAAGCTTGATATCACAAGTTTGTACAAAAAAGCAG  
228 GCTTGTGACGAGCGTCCACGACTTCTACGCCAGCAGCAGCAGCAGTGGCACCTCA  
229 ACAACCAGAATCGCTGTACAGAGTCGTTCAAACGCTCGGAGAAGGCGCGTTCGGC  
230 GAAGTCCTCCTCATCGTCAACACCAAGAATCCAGAAGTGGCGGGCGGCGATGAAAA  
231 AAATCAATATCGCCAATAAAAGCAAGGATTTTCATAGACAACATTCGAAAGGAGTAC  
232 CTTCTTCAGAAACGTGTGTCCGCTGTCGGCCATGACAACGTGATTCGAATGATAGG  
233 AATGCGAAATGATCCGCAATTTTACTATCTTCTCCTGGAATATGCGGACGGCGGAG  
234 AGCTTTTCGATAAAAATAGAGCCCGATTGTGGAATGTTGCCGGTTTTTCGCGCAATTC  
235 TACTTCAAACAACCTCATCTGTGGACTCAAATTTATTCACGATAATGATGTGGTTCAT  
236 CGTGATATTAAGCCGGAAAATTTGCTGCTTACCGGAACTCATGTCTTAAAAATCTCG  
237 GATTTTCGGCATGGCAACTCTTATCGGAACAAAGGAGAGGAGCGACTGCTGGATT  
238 TGAGCTGTGGGACGATTCCGTACGCTGCTCCAGAGCTCTGCGCCGGAAGAAGTAC  
239 CGTGGGCCGCCCGTTCGATGTCTGGTCGTCTGGGATTGTGCTCATTGCGATGCTCA  
240 CCGGGGAGCTTCCGTGGGATCGGGCTAGCGAC

241 ***csn-1(RNAi):***

242 TACCGGGCCCCCCTCGAGGTCGACGGTATCGATAAGCTTGATATCACAAGTTTGT  
243 AAAAAAAGCAGGCTTGTGGATCAACTGGATGGAAGTTGCAATTTGTGCAAATGAT  
244 TGGGGAAAGTTGGATACTGTAACAAATACTGCTTATAGATCATTGAAAGATGCAGA  
245 TGACGCTGAAAAGAACAGTCAACAATCCCAGCAAGCTCCACCACAACGTGGTGAA  
246 AATGCTCCATATATGGTTGAACGTGATCCAAATGCTCCAATTCAAACCTAACAAT

247 CGTCAGTTAATTGAGACGGCTTTAGCCAAATGTCTAGCTGCTCAAGTCTTGCTGAA  
248 GCTTCGAAATAAGCGTTATAGTCAAGTTGTGCGAAACAATTCTTCAAATAAAAACCGA  
249 ATGCCTTCAATCGAAATGGTTTGTGACGTCATCGGATCTCGGAATCTATGGAATGC  
250 TCTCTGCGATGGCTACAATGAGCCGAGCGGACTTGAAGCTTCAAGTTTCTGGAAAT  
251 GGAACATTCCGGAAGCTTCTGGAATCTGAGCCACAGCTCATTGAGCTTCTCGGATC  
252 GTATACATCAAGCCGATTCCGGTTCGATGCTTTGAGATTATGAGATCGGTGAAGCCTC  
253 GGCTTCTTCTCGATCCATTTATCTCTAGAAATGTCGATGAACTTTTCGAGAAAATTC  
254 GGCAGAAATGTGTTCTCCAATACCTTCAACCGTATTCTACGATTAATAATGGCAACG  
255 ATGGCTGAAGCTGTTG

256 ***csn-4(RNAi):***

257 TTGGGTACCGGGCCCCCCTCGAGGTTCGACGGTATCGATAAGCTTGATATCACAA  
258 GTTTGTACAAAAAGCAGGCTTGAGCGGCGAAATTGAACGTTACAGGAGGTGGC  
259 GGTCATTTTTGCACAGGATACCGATCACAAAGGCTCAATATGAAGCATTGGCGAAGC  
260 TTTGCAACAAATATTTGCCACAAAATGCGATGGGACGAGTCGATACGGCGGAAATT  
261 ATTAATAATCATTGATACAGTAATCGCATTGGAGACTGGAAGTATGGTTGTATCACGT  
262 CAATTTGTATCACTTATCACTGAAAGATTGGATAATCAACATTTGGAATCAGAATGT  
263 GTTAAGGCTATTTTCAGAAGGAATTTTGGCGATTATTAAGACTCGAACCATCTCTTAT  
264 GAGGATCAGGTCTGTATCCTCCGCCTCATGCTTGCAAGCCTCTACGAAAAAGAAG  
265 GCCGTATCAAGGACGCGGCCAGGCCCTAATCGCAATAAATTCCGACACAAGCCC  
266 GAAATTCAACGGCCCAAGCGGCGAAAGAAGGCGCCAAGGCCAGCTGTGCAT  
267 TCGAATTACGAAGCTTCTTCTCGACTGTTCTGAAATTGATGAAGCCGAGCAATATGT  
268 GAATCGGACGAGTATTCTTATGGTTGACCTCGGCGCAAATCCAGATATTCAGATTG  
269 AGCATAAAGCTTTGCAGGCTCGAGTTTCAGATGCCAAGCGTCGATTCGTTGAAGCT  
270 GCTCAAAGATACTACGAGCTCAGTGCAACAGAGCAACTTCCCAACTCTGACAAGCT  
271 CACCGCA

272 ***csn-5(RNAi):***

273 CGGGCCCCCCTCGAGGTTCGACGGTATCGATAAGCTTGATATCACAAAGTTTGTAC  
274 AAAAAAGCAGGCTTGGAAGTTGATAACGTCAAGCCACCCAGCTCAGTTCCGCAGA  
275 GAAACTGGGAAAAAGAAAATAACGTCCAAAATGTGATTTCGATTTTTCGAGTACAAC  
276 AACAAGCAGCAAGTAGAAATCAGAAATGCAAAACCATGGGATAAAGATCCACATTA  
277 TTTCAAACAAATCAAAATATCTGCAATTGCTCTTCTGAAAATGACAATGCACGCGAA  
278 AAGAGGTGGAAATCTGGAAATTATGGGACTTTTTCGAAAGGTCGAATCGATGCTAATT  
279 CTTTCATTATTCTTGATGTATTTCGCTCTTCCAGTTGAGGGTACTGAGACCAGAGTCA  
280 ATGCCCAAGCTCAAGCCTACGAGTACATGACAGTTTATTCTGAAATGTGCGATACG  
281 GAAGGTTCGAAAGGAGAAAGTCGTCGGATGGTATCATTCTCATCCTGGATATGGAT  
282 GCTGGCTATCCGGAATCGACGTCTCAACGCAGACACTCAATCAAAAGTTCCAAGA  
283 GCCATGGGTTGCTATTGTTATTGATCCATTGAGA ACTATGTCTGCCGAAAGGTTG  
284 ACATTGGCGCATTCCGTACATATCCAGAAGGATACCGTCCACCAGATGATGTTCCA  
285 TCAGAGTATCAGTCGATTCTCTCGCAAAGATTGAGGATTTCCGGTGTACATTGCAA  
286 ACGATACTACTCGCTTGACGTGAGCTTCTTCAAATCACA ACTTGACGCTCACATCTT  
287 GACTTCTGTGGAACAGCTATTGGATTTCCACTCTCAGCAGTTCTCC

288 ***atl-1+chk-1(RNAi):***

289 GCTCCTCGAACCCATCATCCCTAATTTTCGGTGTCTGTAACAGATTCATCAATAACC  
290 GAACGGACAGGTACCATAATTCCACTGAGAATCTTACAATCACAGTCTACTCTTCG  
291 ATTCATCACCAACTCTTTTCGGATCATATTTCTTATCTCTGAACATAGTCTTGAGACCA  
292 TCAACCTTCTCCGACAATTTACAGTCATCTGATTCAACTTTTCCAGAGACCGTATTA  
293 AATACTCCAGACGCATAATCATATTGATCGATTAACGTTACATAACATGGAGCTTTT  
294 CGTTTAACTTCTGTAAACACTTCCATATATTTCTCTTTGACAGATGCAATGTTTTGAC  
295 GAAGCAAGTATGCTGATTGCCACATACATTGATGTGGCATTTCGAAGAATCAACTGT  
296 TTCATGATTTGTTTGATGGTTCGTGTCACTTCTTCGTCTTGATGATCAATGTGACGA  
297 GCGAGAACTGCGTATGCTGGATAGAATGCACGCCATCCAATATGTTCCAGGGCTG  
298 TTTGAATTTCTCGATTGATGGACTTGATGTTTTGTCTGAGGTCCGAAATTTGTCCTT  
299 CTGGCAGTTTTGGAACAGAGGATATATGAGTGCTCTGAAAATTGGTGTATCACATT  
300 TTAAAATTTAGTTTTTTTTTTACTAATGAAAATAAAAAAGTGTGGAAAATATAACAAATA  
301 ATTATAAAATTTGAGAATTAATTGGTCTTCTAGGTGTAATAATTTTAAATTTTTTTCAT  
302 TCACTAACTTATCATATTTTTCTATTTAGAAAATCTTACAATTTTTTCGAGTATTGCTTA  
303 ACCAAAGTGATGTCATTCTTTCAACTGCACGGGCTTGTAAACTTGATTCTTCTCGT  
304 ACTTTGCAACTTCTTTATAAGCTTTTCAGTAGCGGAAGTACATGTTTGCTTCTTTCTT  
305 ATAATTTGAAAGATAATCCAACAACCACGCAGCTTCATTTCTGCGGACGCTGTCTG  
306 GTCAAGCGGATCCGTGGTATCAGCACAATTTTCGGTCAAGTCGAGACACCGAACGG  
307 GCGGCCACTGAAACGCGCTCGCAACAATGATGAGAATATGTGAGTTTAATAGATG  
308 GCTTCGGCCATATCTGGTGTAGATTTACGGCGCGTTGCGTGTGCGGTCGCGGGCTC  
309 GATTTTAGTTGCGAAAAATGCAATGAGGAAGGCCAGAACCCCATTTAAATTTAAAAA  
310 AAAATCACAAATTTTCATGTTAAAATGCTCAATATATTTCCAGCACATGCACTCAACAAG  
311 CCGAATGCTCCGCGAAACGTCGTCCTTGGAGACTCCGAACGAGAAGAGCACTCT  
312 GGCGGAGAGACAGAATGCTTCGTTCTCCCAGCCGACAAAGACTGAGGATCTTCTG  
313 CTTACTCAGCATATTGATATGTCGCAGACCAACTCGGTTAGGAAAAAACCGTCAGA  
314 AATTGGCGGATTTTTAGCTAAAATCTCCAATTTTTTCGGTTCGTAATTTGGCATTTTTTGA  
315 TAATTTTAGGATGAAAATTCGCTAATGACACGGAAATGGTTGCAAAATTAGAGGTTT  
316 TTGCTAAATTTACTTTTTTTTTTTGATTAATAAACCCAGAATTTAGTTTAAATCCCCCTA  
317 AAATTTTCAGAATCTCCTCCAACGAATGGTGTGCCGTATGACACGTTTCTGCGTCG  
318 TCACCGACATCCGTTCCACGTACCAAAAAGTGGCTCGAGCCAGTGAGCACGCCGG  
319 CTTCCGGCGTTCGTGAGACTGACGACTACCGTCTACTAGTCACGTGGCGCGAGGTT  
320 TCGATGATGGTCAGTCTGTACACGATGGGCGATATTCCCGACAAGCCACGTGTCA  
321 TGGTAGATTTCCGCAGGTCTCGCGGTGACGGAATCCAGTTTAAGAAGATGTTTCATG  
322 GACGTTAGAAACCGTATGCATGAGTGGATATGTACCGACGGAAACAACACTGGCTCG  
323 CCAATCTTGGATATGTGCCAAGAAATCCGCAGATAGTTAATGGTGGTGGAGTCAAT  
324 GTGGAGC

325 ***brc-1(RNAi):***

326 CCCCCTCGAGGTCGACGGTATCGATAAGCTTGATATCACAAAGTTTGTACAAAAAAG  
327 CAGGCTTGGCAGATGTTGCACTGAGGATCACAGAAACAGTGGCACGACTGCAAAA  
328 AGAACTGAAATGTGGAATTTGCTGTTCAACATACAAAGATCCAATTCTGTCCACATG  
329 TTTCCATATTTTCTGTCTGTTCTTGCATTAACGCTTGCTTCGAACGAAAACGAAAAGT  
330 TCAATGCCCAATTTGTAGAAGTGTACTGGATAAGCGAAGTTGTGCGAGATACTTATC



331 AAATTACAATGGCTGTGCAGAACTATTTAAAGCTATCAGAAGCATTAAAAAAGATA  
332 TTGAGAATATGAATACGTTCAAGTCACTGCCGCCAGAGAAAATGTTTCATGGAAAGT  
333 CAAATGCCGCTGGATATCACGATTATTCCAGAGAATGATGGAAAACGATGCGCTCC  
334 AGATTTTGCTATACCTTTTTTGGCAGTGCGCCGAAAGCGACCGAGTCGAGTATTCC  
335 CGCTGGAAAAATTGAAAAAGACGTGGAAACCTCTACAGAAACGTATAAAATATCA  
336 AGAGAAGAAGTGAATAATGTTGATATTGAAGAATACATAAATACCCTCCGAGAAAAT  
337 TCGACAGAGATTGATGAAATCGATGCACTTTTCCAATTAATGCCGACGATGCGACA  
338 ATTTCTTCGAAATAATATCA

339 ***mus-101(RNAi):***

340 CTCGAGGTCGACGGTATCGATAAGCTTGATTCTCACGAGCCCTTCAAAAACCTCTCA  
341 ATGCATAGGAATTAAGTGAATCCCAGGATAAAGCACTAAATCTGCCCATTTGTGGTT  
342 TGAGAAGTTTCCAGAGATCATCAATCCATCCGATTTCGCATTAATTTGATTGAATTA  
343 TTGACAGCAGCCTGGAATTTTTTTATTTTATTTTAAATTTCTGCTTGATACTATTTA  
344 ACCTTATACTTTTCCGTCTGTTCTGCTTTTTTTCAGTTACTAGGTGAGTCGTTTCGTGA  
345 TATAGAGCATCTCCAACCACTCCACACATCCATCCGATTTTTTTCGTAGAGTTCTTGC  
346 TTTTTCGTAAGATTCAACCCGGTGAAACTGATTTTTACGTCTTGAAAAACACTGGAA  
347 TACTGATGATTCCATTGTGGGAGCTGCTTCCCATCTTCGATACTTTCAAGAACA  
348 ATTGGAGGACCGTATACTCTGAATATTGTAATTTTATTTTGTGGACTTGAATTTATTT  
349 GAATTTAATTTAACACAACTTCAATTTCCGGGCTTGAAGTTTTCGAAAAAGCTTTC  
350 CGCGGAAACAGGGTAAAACGAAAAAGTCTTCAGATTTCTGCAGATCTTCGAGTGCA  
351 TCTGAATCAATCCATTCTGGCATGATTCCACAGCTTTTGCAGTCTGAAAATACGCC  
352 TAAAACCTTGAAAAATAAATAAATTAATAACGCAATACTTTGAAT

353 ***clsp-1(RNAi):***

354 ATTAATACGACTCACTATAGGGAGACCGGCAGATCTGATATCACCACTTTGTACAA  
355 GAAAGCTGGGTATTCCAAAGAGCTAAGTTTACTAGATCTGACACGTTTTGCAGATG  
356 CTGACGATTCTGGCGATTTTCAGCAATCGTTTTCTGTGCTCAATCGAGACGACGGA  
357 GAACTTATATGTCCAGTTGAGAGAGGAGTTGGCTTCTCAAAGCTTTGCACATACAT  
358 CTGTTTTGCTGCACCTCCAGGTCCATTGAGAACTTCTTCAAATGTGACAGCAAGAG  
359 TGGTTTTTGCAGTAGAGATGGCTTGTGAGTCTCGGTTTGAACATTGTTTCTTCG  
360 GAGAATTCGATTACAGTTTTTTTCAGTTTTCTTGAATAGCTTTCCGGCGCGAGCAAAC  
361 ATATCATCGCCTTGTTCGGCTCATCGAGCAACATCAATTCTTCCGCATGTTTCATAT  
362 TTGAACTTGATCATTTCGGCTCGTTCTTCTTTTTTTGTTTCATCTTCTTCTGGTTCAT  
363 CATCTTCTCTATCACCATCATTTCATCTACATCATCTCCCATTTGAATTTGAACTTC  
364 TTCTCGTAACTTGAAACGGAATTGACGATTTCGCTCAACTCCACCGAGATCTCCGT  
365 CGGCAAGTAGACGGTCTTGAAGTTTTGCAAGCTCTCTTTGTTCTTATCGTTTTCT  
366 GTTTCAGCAACAACCTTATGATTCT

367 ***tim-1(RNAi):***

368 CGATAAGCTTGATTCTTTGAATCGAAAGCTTGGCAAACCTTCTGCTGAGCATCTACG  
369 GGAACATCAAGCTGCGAGTCGATCGGGTTCATTCCCCTCATCTCCGGCACTTCTTT  
370 CTTCAGAATTTGAAGTACAAGGCCCTTGGATTCTCCAGAGCCGATCGAGATCCT

371 TCTTGCTCATTCCATCAAACCTCCGAGCGGACATCCTCCTCGGACATCTTGCTCTTC  
372 TTCGTAGCCTTCCGCACCTTCACCTTCTTCGTGACTTTCTTCAATGCTCCTGTCTTC  
373 ACAAATCTCTCGACAAGCTTCATGTAGTGATGTGTGGTGAGCACAAGCTCTCGGAG  
374 AAAGTTGTTAGAGAGCACGGAGCTCGAGAATTTCTTAATGATGAAAATCGGCAGCT  
375 CTCTGTA CTCTCAACGTTCAACAATATGCTCCAGCGCTCGTTTTCGCGAATTTCCGTT  
376 CATTCTCCTCCTTGGCATGCTCGTAGATATAACGGTGAAGGAGCACAAGCTCATTG  
377 TAAGCTCCGAGAGCATACTGAGCCTTCAGCCCATGACTCTTAGCTTCGACTCCCTT  
378 CAGCGTAGTCGCATTCTCCACGTATTCCGTGAGTTGGACGTTATTCTCGTGGAATG  
379 CTTCAACTCCGATGCACTCTGAGATCCTTTTCGAGGAGATGATCCTGACGCGATAGC  
380 CTGACGAATCGGAGGACGAACTTGATCAGGAAGAAGTAGTTGATTTGGGATGTCTT  
381 TT

382 ***tipn-1(RNAi):***

383 CCCCCTCGAGGTCGACGGTATCGATAAGCTTGATTACCAATCGTTATTCATATCAC  
384 CGAAATCTTCCATAAGAGCATCTTCGTCAGCAGCTTCCTTGGCTTCCTGTTCTCTC  
385 GCAGCCGCTCTTCCCTCCATCATTGATACTCTTCCTCGACATTTTCATCAATTTAG  
386 CGGTTTTTTGGTCGGATTTTTTCAGAATTTTTGGCTTTTTTCAGTCGTGACTTCTGAAAT  
387 TGAAAGATTTTTTGAATTTCTAATAACAAGTTTGGATAAATTTTGAACCTTTCTCTG  
388 GTAAATCCTTGAATAAATCATCGTCGTTATCACTCGCTCCATCATCAATAATTCCATT  
389 CTTTTGATTCTCCTGCTCCTCGTGCTCAGAATCCTCGCCAGTCTCTCCAAGCCGGT  
390 GCTTGATCATGAAAACCTTAACTGCGCCGTGTTCCCAGTGTCTCGACTCGATTG  
391 AGAACATCTTCGGTTTTTCATCTTCGGAAACATCAAATGTCCCAGTATGCGTATTTT  
392 TTCATCAATTTCTCCAGATTTGCGTACTGAAAAGGAAAATTATTGTATTTTTAACT  
393 TTCAAATTTACCGGATCATCCTTGGGATTTGGCTTGAAATCTTTTAAAGTCTCCCGA  
394 AGAGCTGAAATTCCTTTTCGGCCCGGTCAAATTCGCTCATTAGTGCTAGGCGTGG  
395 ATTC

396 ***Irr-1(RNAi):***

397 GCCCCCCCTCGAGGTCGACGGTATCGATAAGCTTGATTTCCCAGTGCTCTTTTAT  
398 CGGGTTCAACTTGATTTTTCCAGAACTTATTTTGATTTTCAGAGACTTGCTTTTCAA  
399 TACAAAGAACTACCAATAGTTGCTTATTCCAGATTTCAATAAAAAATGCGATTACC  
400 ATGTGAAGTGGTTTTTGCACGTTATAAAGCAAATGCCGGAGTTAATCCAAAACCCA  
401 CGAAATCGCAAAAAGGATTTGTTATTCTGCAAAAACCTTCGACAGGTAATTTAAATTT  
402 TCATAAGTTAATATGTAACAAAACAAAAAATATTTCCAGACCCCTCCACAATATCA  
403 GATAACAGTGGCCGTGGCCGGTGACAAAACCTGGAAATAAATTCGAGCTCAACAAG  
404 CCGCCAATTATTCTCGACAAATTTATTGCTCAAGGAAAAACCACTATCACATTTCAA  
405 ACAACTCCTGCTGTGATGGTTTGCATCAGTAAAGTACGTGTAAAGCATTTTTCAATA  
406 TAAAAATAATAATTTTTATTGTTTCAGGCGAATCCAGAAGCGTTGGCACAACCTGATAG  
407 AAGCCATCAGAAAAATTGTCAAAGGAGAAAATGTGGATATTGAGAAAGTGAAGGTA  
408 TTAAGCTTGACGGTGAATGAAAGAATTAATAAATAACTATTTTCAGGTA AAAAG  
409 TTCCGACTTCAAACCAACTACCATCACGGTCAACAATCAGGCAACGTACAAAAAGC  
410 AAATGCAATCATGCTCCGAATTCCTGAAAACACTAA

411 ***hpr-9(RNAi):***

412 GATAAGCTTGATTACGATGCAAAAACGACAGTGATATTTCTACATCCAGAACGATTA  
413 TATGTTGGCTTATGAAGCATTGATCCCATTCTCGAAGCTTTGCGTGAATTGTTTCGC  
414 TCAATATCTGAAAATTCGGCCAATTTTTCGAATATTCTGCAGCTAATTTTTCTTGCCAT  
415 AATTCATCTGAAGCTTCACCATCATCCGTTTCAGCCTTCGGATCGATTTCGAAATTCAC  
416 ATCCAACAAAGTTCTTCTCCCCGAACGCGACGCCCTTGAAAATACGCTGAGCTGAC  
417 TGAAAAAAAATTAATTTTTGCCGAAATTTCTGAGATTTCTCCCCACTTTTCATCGATA  
418 ATCTGCAAATATTCACTGCTTTTTTTGTTAATCATTGATACATCGCAAGCGTTGAAAAA  
419 TTCTGGTGCAAAGCGGAACACGCAGAACTTTGAACGGTTCACTGTTTTGAAGAAGA  
420 GCTGGAAAAAAACAAAAAATAATTTTTAGCCGAAATTTGACTTTTGACTCACCCC  
421 GCCTTCGGAAACCTCAATTAACACGTCTTCAGAGATTTTGCTCAGCGCTGCGATGG  
422 ATCTTGACATAACTGAAAGAAAAATAAATAAATAATCCGGCTAAAACCCAGAAAAAG  
423 TCACTTTTAAGATTGGATTGGGCCACAAATTGGGCGCCTTTCATATCTTCATGCTGC  
424 CTTTCCCTTGTTATTGATGACGATGGATTATCTGTAT

425 ***pyr-1(RNAi):***

426 CCTCGAGGTTCGACGGTATCGATAAGCTTGATTTGTAGCTCGAATTGCAGGTGAATC  
427 TGAAGCCATCATTGCACGAGTAGCCAAAGCCACAAAATCGTAATCGAGAGTTTTTG  
428 AGACGAACGGGAATGATCTGGATACTCGCAAGTTGCATTCAATAACTTTGAGTTTCG  
429 TTATTTTTAGCAATGAGCTGCATATTGAAAGGTCCGTTGACATTAATGCTTCAGCG  
430 ATTCTGAAAGTGATATCCTTGATTCTATCCAATGTCAGTTTGTTTCATATCCTGAGCT  
431 GGAGTGACAAGAGTAGCATCTCCCGAATGAACACCTGCATTTTCAATATGTTCACT  
432 GACAGCCATTACAACGAGTTTTCCATCAAGGGCAACTGCATCTACATCCAATTCCT  
433 TCGCTTCATTGATAAATTTGCTCACAACAACCTGGATGCTCCTTGCGGACCACAGCA  
434 GCTTGCTTGAGAAAGACTTCCAAGTCTTCAGCGTTGTGAGCCACATTGCTGC  
435 ACCAGATAAAACATATGAAGGACGGATCAAGCATGGATATCCAACCTTGAGCACAGA  
436 AGTTCTTAGCATCTTCCATATTTTCGCTTTTCTTCCATTGTGGCTGGCTGATTTTCAA  
437 AGATTCCAATTTTCTTGAGAACTTGAATCTATCTTCTGCGTTATCAATGTCGTTTGGT  
438 GAAGTTCCAAGATCTTCACCTGAGCTCTGCTCAAGCTCATCGCAATGTTATTCGG  
439 TGCTTGACCTCCAATGCCAGAA

440 ***gmpr-1(RNAi):***

441 ATCAAACCTGAAAGATGCCTCGCATCGAAAACGAGCCGAAGCTCGATTTCAAGGATG  
442 TGCTGCTCCGTCCGAAACGATCTACTCTGAAGAGTCGAGCTGATGTCGAGTTGGAT  
443 AGGGAATACGTGTTCCGTAACCTCCAAGGCCACCTACACTGGTGTCCCAGTGGTTG  
444 CGTCCAACATGGACACTGTTGGAACTTTCGAGATGGCTGCCGCGTTGAACAATCA  
445 CAAGATCTTCACTACGATTCACAAGCACTATAGTGTAAGTGAGAATTTTCAGGAATTT  
446 CAGCTAAATTTTGATATTTTTATTTATTTTTAGGTTCGACGAGTGGAAGCATTTCGC  
447 CGCTTCTGCGTCTCCAGACACCTTCAACAACCTTGGCAATCTCATCTGGAATTTCCG  
448 ATAACGACTGGACCAAGCTCAACACCGTCATCACTGAGCTTCCACAACCTCAAGTAC  
449 ATCTGTCTTGACGTGGTCAACGGATATTCTGAATCTTTCGTGGAGTTTATTCGCCGT  
450 GTTCGAGAAGCCTACCCGAAGCACACCATCATGGCCGGAACGTTGTCACCGGAG  
451 AGATGGTTGAGGAGCTGATTCTGTCTGGCGCCGACATTGTCAAGGTCGGAATCGG  
452 ACCGGGATCGGTTTGC
